# Supplementary material
Source: PubMed Central journal article supplement (PMC4450422)
Supplement: pnas.1422319112.sapp.pdf [file pnas.1422319112.sapp.pdf]

# Supplemental Material

## S1 Weathering reduction associated with an increase in organic carbon burial

What is the impact of increased organic carbon burial on weathering and  $p\text{CO}_2$ ? The following reasoning might at first glance appear sound. Utilizing the traditional carbon isotope mass balance (Equation S1):

$$\delta^{13}\text{C}_{\text{in}} = \delta^{13}\text{C}_{\text{carb}} - f_{\text{org}} * \epsilon \quad (\text{S1})$$

Then, applying  $\delta^{13}\text{C}_{\text{in}} = -5\text{‰}$ ,  $\epsilon = 25\text{‰}$ , and an organic carbon burial fraction ( $f_{\text{org}}$ ) of 0.2 gives the canonical value of 0 ‰. Increasing  $f_{\text{org}}$  from 0.2 to 0.6 yields a value of +10 ‰. Hence, if during the Lomagundi Event the organic carbon burial fraction increased from 20% to 60%, then carbonate carbon burial must have decreased from 80% to 40% of the total, i.e. by 50%, thus requiring a 50% reduction in weathering.

However, this estimate is erroneous, as it does not take into account the constraints imposed by alkalinity, which imply a far greater reduction—on the order of 91%. To illustrate the underlying logic, we employ a more complete description of the carbon cycle, one which includes alkalinity (Figure S1). For the magnitudes of the fluxes we use values modified from Kump and Arthur (1):  $F_{\text{volc}}^{\text{w}} = 5$ ,  $F_{\text{carb}}^{\text{w}} = 36$ ,  $F_{\text{sil}}^{\text{w}} = 4$ ,  $F_{\text{org}}^{\text{w}} = 9$ , and  $F_{\text{org}}^{\text{b}} = 10$ ,  $F_{\text{carb}}^{\text{b}} = 40$ , all in Tmol/yr. An increase in the fraction of organic carbon burial ( $f$ ) of 0.2 to 0.6 implies an increase in the burial of organic carbon ( $F_{\text{org}}^{\text{b}}$ ) from 10 to 30 Tmol/yr and a commensurate reduction in the burial of carbonate carbon ( $F_{\text{carb}}^{\text{b}}$ ) from 40 to 20 Tmol/yr. To balance the reduction in carbonate burial, the input of alkalinity from the weathering of silicates and carbonates ( $F_{\text{sil}}^{\text{w}} + F_{\text{carb}}^{\text{w}}$ ) would have to decline from 40 to 20 Tmol/yr as well. But then not enough carbon is brought in to balance the total carbon output: only  $18 + 9 + 5 = 32$  Tmol/yr are brought in but 40 Tmol/yr

23 are removed. Thus, an additional decline in burial of carbonate and organic carbon is required,  
 24 which requires another decrease in the weathering flux, and so forth. Consequently, the overall  
 25 resulting reduction in weathering is far larger than the simplistic estimate of a 50% reduction.

26 The procedure for calculating the inputs and outputs of carbon and alkalinity, for a specified  
 27 fraction of organic carbon burial, is given below. We make only three assumptions: 1) that the  
 28 system is at steady-state, 2) that the only inputs of carbon into the system are from volcanism  
 29 and the weathering of carbonate and organic carbon, and 3) that the only inputs of alkalinity are  
 30 from the weathering of carbonate and silicate rocks.

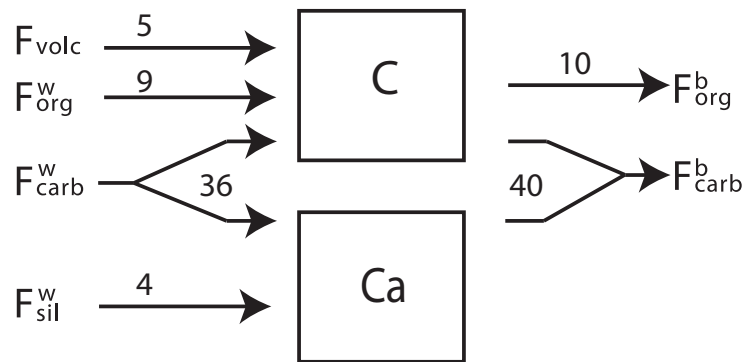

Figure S1: Basic carbon cycle model for the ocean-atmosphere carbon pool. Modified from Kump and Arthur (1). Units in Tmol/yr.

31 We begin by expressing the equality between the inputs and outputs of carbon that must exist  
 32 at steady-state (Equation S2). We introduce a multiplier,  $\beta$ , which represents the decrease  
 33 (or increase) in the weathering derived fluxes relative to their original steady-state values (for  
 34 instance a 20% reduction would be  $\beta = 0.8$ ). The multiplication of the weathering of organic  
 35 and carbonate carbon fluxes by  $\beta$  indicates that they are surficial fluxes subject to physical and

36 chemical weathering processes, whereas volcanic carbon input is not.

$$F_{\text{volc}} + (F_{\text{org}}^{\text{w}} + F_{\text{carb}}^{\text{w}})\beta = F_{\text{org}}^{\text{b}} + F_{\text{carb}}^{\text{b}} \quad (\text{S2})$$

37 Dividing by  $F_{\text{carb}}^{\text{b}}$  gives:

$$\frac{F_{\text{volc}} + (F_{\text{org}}^{\text{w}} + F_{\text{carb}}^{\text{w}})\beta}{F_{\text{carb}}^{\text{b}}} = \frac{F_{\text{org}}^{\text{b}}}{F_{\text{carb}}^{\text{b}}} + 1 \quad (\text{S3})$$

38 The ratio of the organic to carbonate carbon burial fluxes, on the left, can be expressed in terms  
39 of the organic carbon burial fraction ( $f_{\text{org}}$ ):

$$\frac{F_{\text{org}}^{\text{b}}}{F_{\text{carb}}^{\text{b}}} = \frac{f_{\text{org}}}{1 - f_{\text{org}}} \quad (\text{S4})$$

40 So that:

$$\frac{F_{\text{volc}} + (F_{\text{org}}^{\text{w}} + F_{\text{carb}}^{\text{w}})\beta}{F_{\text{carb}}^{\text{b}}} = \frac{f_{\text{org}}}{1 - f_{\text{org}}} + 1 = \frac{1}{1 - f_{\text{org}}} \quad (\text{S5})$$

41 Now we take into consideration the fact that the carbonate burial flux must conserve the contri-  
42 bution of alkalinity from the carbonate and silicate weathering fluxes:

$$(F_{\text{carb}}^{\text{w}} + F_{\text{sil}}^{\text{w}})\beta = F_{\text{carb}}^{\text{b}} \quad (\text{S6})$$

43 We substitute the alkalinity constraint back into the expression obtained from the carbon mass  
44 balance:

$$\frac{F_{\text{volc}} + (F_{\text{org}}^{\text{w}} + F_{\text{carb}}^{\text{w}})\beta}{(F_{\text{carb}}^{\text{w}} + F_{\text{sil}}^{\text{w}})\beta} = \frac{1}{1 - f_{\text{org}}} \quad (\text{S7})$$

45 Rearranging for  $\beta$  yields the final expression:

$$\beta = \frac{F_{\text{volc}}}{\left(\frac{1}{1 - f_{\text{org}}}\right) (F_{\text{carb}}^{\text{w}} + F_{\text{sil}}^{\text{w}}) - (F_{\text{org}}^{\text{w}} + F_{\text{carb}}^{\text{w}})} \quad (\text{S8})$$

46 Substituting the values for the weathering fluxes and volcanic input allows estimating  $\beta$  for a  
47 given  $f_{\text{org}}$ . If we further assume  $\beta = \text{RCO}_2^{0.3}$  we can estimate  $\text{RCO}_2$ , defined as the ratio of

| $f_{org}$ | $\delta^{13}\text{C}$ | $\beta$ | $\text{RCO}_2$          | $p\text{CO}_2$ |
|-----------|-----------------------|---------|-------------------------|----------------|
| 0.2       | 0                     | 1       | 1                       | 10,000         |
| 0.4       | 5                     | 0.23    | 0.0075                  | 75.3           |
| 0.6       | 10                    | 0.09    | 0.00033                 | 3.37           |
| 0.8       | 15                    | 0.03    | $1.0685 \times 10^{-5}$ | 0.1            |

Table S1: Values of  $\beta$  calculated in accordance with Equation S8. Also shown are the corresponding  $\delta^{13}\text{C}$  values (assuming the canonical values of -5 ‰ and 25 ‰ for the carbon input and photosynthetic fractionation), the  $\text{RCO}_2$  value, and the  $p\text{CO}_2$  value required to maintain steady-state.

48 perturbed  $p\text{CO}_2$  to baseline  $p\text{CO}_2$ . We also include the estimated reduction in  $p\text{CO}_2$  from a  
 49 baseline of 10,000 ppm.

50 As can be seen in the values in Table S1, the values of  $\beta$  decline precipitously as the values  
 51 of  $f_{org}$  increase. At high values of  $f_{org}$  (and  $\delta^{13}\text{C}$ ),  $\beta$  is dramatically reduced suggesting that  
 52 non-physically low levels of weathering are required.

## 53 **S2 Volcanic carbon inputs and organic carbon burial**

54 Could a long-lived, but temporary increase in carbon inputs potentially prevent atmospheric  
 55  $\text{CO}_2$  levels from crashing, while still allowing increased organic matter burial? To estimate the  
 56 required increase in carbon input the following calculation might be carried out: carbon isotope  
 57 mass balance requires that  $f_{org}$  be equal to 0.6 for  $\delta^{13}\text{C}_{\text{carb}}$  to reach + 10‰ (if epsilon is 25‰).  
 58 Then, assuming the total influx is composed of the initial influx (x), 20% of which is buried  
 59 as organic matter, and an additional influx (y), 100% of which is buried as organic matter, the  
 60 carbon isotope mass balance is:

$$\delta^{13}\text{C}_{\text{in}} * (x + y) = \delta^{13}\text{C}_{\text{carb}} * 0.8 * x + \delta^{13}\text{C}_{\text{org}} * 0.2 * x + \delta^{13}\text{C}_{\text{org}} * y \quad (\text{S9})$$

61 Then, substituting the values for  $\delta^{13}\text{C}_{\text{carb}}$  (+10‰) and  $\delta^{13}\text{C}_{\text{org}}$  (-15‰):

$$-5 * (x + y) = 10 * 0.8 * x - 15 * 0.2 * x - 15 * y \quad (\text{S10})$$

$$-5x - 5y = 8x - 3x - 15y \quad (\text{S11})$$

$$10y = 10x \quad (\text{S12})$$

$$y = x \quad (\text{S13})$$

62 So a doubling of the total carbon input is implied, i.e.:

$$\frac{y}{y + x} = 2 \quad (\text{S14})$$

63 However, this calculation, similarly to the calculation presented in the opening to Section S1,  
 64 fails to take into account the constraints imposed by alkalinity. Using the framework presented  
 65 in S1 we can carry out a more refined calculation and show the difficulty with this proposed  
 66 solution. We include an additional carbon flux to the mass balance so that it becomes:

$$\frac{F_{\text{volc}} + F_{\text{extra}} + (F_{\text{org}}^{\text{w}} + F_{\text{carb}}^{\text{w}})\beta}{(F_{\text{carb}}^{\text{w}} + F_{\text{sil}}^{\text{w}})\beta} = \frac{1}{1 - f_{\text{org}}} \quad (\text{S15})$$

67 The magnitude of  $F_{\text{extra}}$  should be large enough so that no reduction in weathering occurs ( $\beta \geq$   
 68 1), and it must also honor the isotopic constraints which suggest that 60% of incoming carbon  
 69 was buried as organic carbon ( $f_{\text{org}} = 0.6$ ). Using the same values for the fluxes as in Section  
 70 S1 ( $F_{\text{volc}} = 5$ ;  $F_{\text{wcarb}} = 36$ ;  $F_{\text{worg}} = 9$ ;  $F_{\text{wsil}} = 4$ , all in Tmol/yr), substituting  $\beta = 1$  and  $f_{\text{org}} = 0.6$ ,  
 71 and then solving for  $F_{\text{extra}}$  yields:

$$\frac{5 + F_{\text{extra}} + 9 + 36}{36 + 4} = \frac{1}{1 - 0.6} \quad (\text{S16})$$

$$\frac{50 + F_{\text{extra}}}{40} = 2.5 \quad (\text{S17})$$

$$F_{\text{extra}} = 50 \text{ Tmol/yr} \quad (\text{S18})$$

72 So, the results indicate that 50 Tmol/yr of extra carbon are required, an amount that is equal to  
73 the total baseline input flux of carbon ( $F_{\text{volc}} + F_{\text{wcarb}} + F_{\text{worg}}$ ). Thus, this calculation indicates  
74 that a doubling of the total input flux of carbon is required, exactly as indicated by the simple  
75 calculation above, but now the difficulty becomes apparent: the extra carbon has to be supplied  
76 in “volcanic” form, that is as  $\text{CO}_2$  and not  $\text{HCO}_3^-$  or  $\text{CO}_3^{2-}$ . The reason is that carbon in the form  
77 of carbonate alkalinity ( $\text{HCO}_3^- + \text{CO}_3^{2-}$ ), such as supplied by the weathering of calcium silicates  
78 and carbonates, is already tied to burial of carbonates and thus is unavailable for organic carbon  
79 burial (or at least without causing an imbalance in alkalinity and a decline in  $p\text{CO}_2$ ). An increase  
80 in the organic carbon weathering flux is also out of the question since it would simply undo the  
81  $^{13}\text{C}$  enrichment effected by the elevated organic carbon burial. Consequently, an eleven-fold  
82 increase in volcanism is required (from 5 to 55 Tmol/yr), and not simply a two fold increase  
83 in total carbon input. This required increase in volcanic input is very large, and, even if such  
84 an increase were geologically plausible, it would only solve half the problem: an increase in  
85 volcanic  $\text{CO}_2$  input would resolve the conundrum of  $\text{CO}_2$  deficit, but not answer the difficulty  
86 of  $\text{O}_2$  accumulation. Thus, other sources of  $\text{CO}_2$  which also consume  $\text{O}_2$ , such as siderite and  
87 sulfide oxidation, must be seriously considered.

### 88 **S3 Organic carbon burial accompanied by pyrite oxidation**

89 An increase in organic carbon burial, unaccompanied by increased carbon input, leads to non-  
90 physically low levels of weathering because of the resulting imbalance in alkalinity. Pyrite  
91 oxidation can ameliorate this imbalance by supplying acidity, thus bolstering  $p\text{CO}_2$  levels. As  
92 stated in the main text, both the acidification of limestones by sulfuric acid and the sulfuric acid

93 weathering of silicates equally lead to the release of carbon dioxide. The former acts by direct  
 94 conversion of carbonate to  $\text{CO}_2$ , while the latter by replacing carbonic acid weathering with  
 95 sulfuric acid weathering and thus allowing volcanic  $\text{CO}_2$  to go un-consumed. Consequently,  
 96 the resulting  $\text{CO}_2$  is available for organic carbon burial without any charge balance constraints,  
 97 in contrast to carbonate alkalinity ( $[\text{HCO}_3^-], [\text{CO}_3^{2-}]$ ). It is, nonetheless, important to note that  
 98 the supply of carbon from the sulfuric acid weathering of silicates should not exceed the flux of  
 99 volcanic carbon that would otherwise exit as  $\text{CaCO}_3$  (4 Tmol/yr). Acidification of Ca-silicates  
 100 in excess of this quantity would lead to an increase in  $\text{CaCO}_3$  burial and a decrease in the  $\delta^{13}\text{C}$   
 101 of the ocean-atmosphere system.

102 To constrain the required fluxes we augment our previous carbon cycle model with a sulfate  
 103 box, with one input flux of sulfate from pyrite oxidation and one output flux of  $\text{CaSO}_4$  (Figure  
 S2):

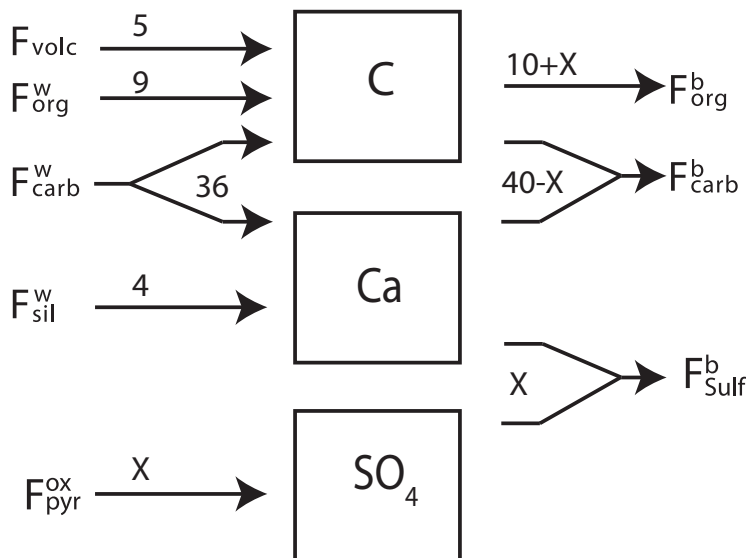

Figure S2: Basic carbon cycle model for the ocean-atmosphere carbon pool with a sulfate box. X is the variable pyrite oxidation flux. Modified from Kump and Arthur (1). Units in Tmol/yr.

105 We start with the three mass balance equations, one for each element:

$$\text{C : } F_{\text{volc}} + F_{\text{org}}^{\text{w}} + F_{\text{carb}}^{\text{w}} = F_{\text{org}}^{\text{b}} + F_{\text{carb}}^{\text{b}} \quad (\text{S19})$$

$$\text{Ca : } F_{\text{sil}}^{\text{w}} + F_{\text{carb}}^{\text{w}} = F_{\text{carb}}^{\text{b}} + F_{\text{sulf}}^{\text{b}} \quad (\text{S20})$$

$$\text{S : } F_{\text{pyr}}^{\text{ox}} = F_{\text{sulf}}^{\text{b}} \quad (\text{S21})$$

106 Rearranging we get:

$$F_{\text{sil}}^{\text{w}} + F_{\text{carb}}^{\text{w}} - F_{\text{pyr}}^{\text{ox}} = F_{\text{carb}}^{\text{b}} \quad (\text{S22})$$

107 Dividing by  $F_{\text{carb}}^{\text{b}}$

$$\frac{F_{\text{volc}} + F_{\text{org}}^{\text{w}} + F_{\text{carb}}^{\text{w}}}{F_{\text{carb}}^{\text{b}}} = \frac{1}{1 - f} \quad (\text{S23})$$

108 And substituting back into the expression for carbon:

$$\frac{F_{\text{volc}} + F_{\text{org}}^{\text{w}} + F_{\text{carb}}^{\text{w}}}{F_{\text{sil}}^{\text{w}} + F_{\text{carb}}^{\text{w}} - F_{\text{pyr}}^{\text{ox}}} = \frac{1}{1 - f} \quad (\text{S24})$$

109 Then isolating the oxidation flux of pyrite gives:

$$F_{\text{pyr}}^{\text{ox}} = (F_{\text{sil}}^{\text{w}} + F_{\text{carb}}^{\text{w}}) - (1 - f)(F_{\text{volc}} + F_{\text{org}}^{\text{w}} + F_{\text{carb}}^{\text{w}}) \quad (\text{S25})$$

110 We can then calculate the necessary pyrite oxidation fluxes required to balance the burial of  
 111 organic carbon by removal of calcium as gypsum (Table S2):

| $f$ | $\delta^{13}\text{C}$ | $F_{\text{pyr}}^{\text{ox}}$ | $\text{O}_2$ imbalance |
|-----|-----------------------|------------------------------|------------------------|
| 0.2 | 0                     | 0                            | 0                      |
| 0.3 | 2.5                   | 5                            | -4.375                 |
| 0.4 | 5                     | 10                           | -8.75                  |
| 0.6 | 10                    | 20                           | -17.5                  |
| 0.8 | 15                    | 30                           | -26.25                 |
| 1   | 20                    | 40                           | -35                    |

Table S2: Pyrite oxidation flux required to balance elevated organic carbon burial, in Tmol/yr. The  $\text{O}_2$  imbalance is the extra  $\text{O}_2$  required for pyrite oxidation beyond that which is produced by organic carbon burial, in Tmol/yr.



112 As an example of how pyrite oxidation makes CO<sub>2</sub> available for organic carbon burial, consider  
113 the end-member case where  $f = 1$ , i.e. all the carbon coming in is buried as organic carbon  
114 and none as carbonate carbon. In this case carbonic acid weathering of silicates and carbonates  
115 must be zero. For  $p\text{CO}_2$  to remain elevated, carbonic acid weathering must be replaced by  
116 sulfuric acid weathering. Thus, a SO<sub>4</sub><sup>2-</sup> flux of 40 Tmol/yr, with 4 coming from sulfuric acid  
117 weathering of Ca-silicates and 36 from acidification of carbonates completely compensates for  
118 missing carbonic acid weathering. Now, 40 Tmol/yr of Ca that would otherwise exit as CaCO<sub>3</sub>  
119 get buried as gypsum (or accumulate in the ocean), making available for organic carbon burial  
120 40 Tmol/yr of carbon. The only remaining problem is that pyrite oxidation requires  $15/8 \cdot 40 =$   
121 75 Tmol/yr of O<sub>2</sub>, which is 35 Tmol/yr more than organic carbon burial can supply.

122 It is pertinent to note that the oxygen deficit would be even more severe if sulfide oxidation and  
123 carbonate dissolution occurred without a concomitant increase in organic carbon burial. In the  
124 framework of the above example 75 Tmol/yr of O<sub>2</sub> would be consumed and not just 35 Tmol/yr.  
125 Consequently, the oxygen imbalance which arises during sulfide oxidation argues against recent  
126 claims for sulfide oxidation as a long-term source of carbon (2). And, if sulfide oxidation did  
127 make a significant contribution of carbon during Himalayan uplift, as argued by Torres et al.  
128 (2), it would have driven a substantial drop in  $p\text{O}_2$  during the Cenozoic, something for which  
129 there is no evidence.

## 130 **S4 Siderite Oxidation and $\delta^{13}\text{C}$**

131 Siderite oxidation can be called upon as a source of carbon over geologic timescales since, in  
132 contrast to sulfide oxidation, it produces more CO<sub>2</sub> than it consumes O<sub>2</sub> (Equation S26) and  
133 so can supply CO<sub>2</sub> in excess of the amount that is required by organic carbon burial to keep  
134 the process going. However, in the context of the Lomagundi Event, the oxidation of siderite

135 must have also been coupled to processes that produce acidity (sulfide oxidation) or consume  
 136 O<sub>2</sub> (iron silicate oxidation) as siderite oxidation alone together with the simple (carbonic acid)  
 137 weathering silicates could not have generated the Lomagundi Event. The reason is that the  
 138 alkalinity generated during the consumption of the excess carbon by silicate weathering would  
 139 have negated the <sup>13</sup>C enrichment effected by organic carbon burial.

140 To appreciate this difficulty, and more generally, some of the intricacies of siderite oxidation,  
 141 consider the oxidation of siderite coupled to weathering of silicates and the burial of organic  
 142 carbon and carbonate carbon:

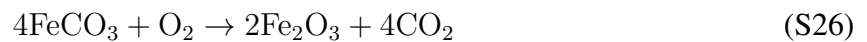

143

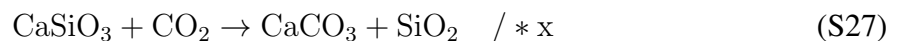

144

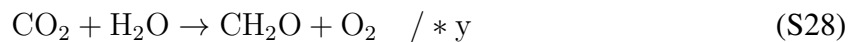

145 One could combine these equations in two ways: first, as an overall CO<sub>2</sub>-neutral reaction (x +  
 146 y = 4), and second, as an O<sub>2</sub>-neutral reaction (y = 1). Together with the constraints from the  
 147 carbon isotope record ( $f_{org} = y/(y + x) = 0.6$ ) one can obtain the desired stoichiometries. In  
 148 the O<sub>2</sub> neutral case y = 1 and x = 2/3, and in the CO<sub>2</sub> neutral case x = 1.6 and y = 2.4. Hence,  
 149 the CO<sub>2</sub>-neutral reaction leads to net release of O<sub>2</sub> at a rate of 1.4 moles of O<sub>2</sub> per 4 moles of  
 150 siderite oxidized, while the O<sub>2</sub> neutral reaction leads to net release of CO<sub>2</sub>, at a rate of 2 1/3  
 151 moles per 4 moles of siderite oxidized.

152 These imbalances cannot be maintained over timescales of hundreds of m.y. of years over which  
 153 the Lomagundi Event occurs. In the CO<sub>2</sub> neutral reaction one is left with with a large excess of  
 154 O<sub>2</sub>, and in the O<sub>2</sub> neutral reaction case one is left with a large excess of CO<sub>2</sub>. The duration of  
 155 the event is such that if the organic carbon burial were not fully compensated in terms of both  
 156 CO<sub>2</sub> and O<sub>2</sub> physically non-permissible atmospheric compositions would quickly arise (i.e. pO<sub>2</sub>

157 or  $p\text{CO}_2 \gg 1$  atm). Thus,  $\text{CO}_2$  or  $\text{O}_2$  must not appear in the overall reaction for oxidation of  
158 siderite together with the weathering of calcium silicates; nor for that matter should they appear  
159 in any other reaction which is postulated to have taken place over the duration of the Lomagundi  
160 Event. Below we give the appropriate reactions for siderite oxidation coupled to calcium silicate  
161 weathering, siderite oxidation coupled to Fe-silicate weathering, and siderite oxidation coupled  
162 to Fe-sulfide oxidation and acidification of carbonates.

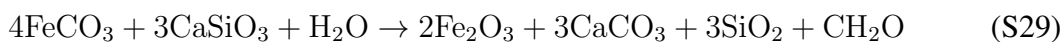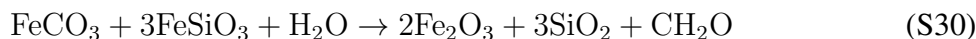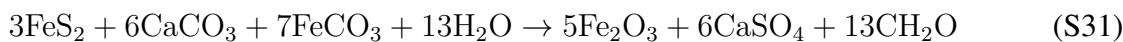

165 What are the biggest differences between the three reactions? Examine the first reaction above  
166 (Equation S29): the 1 mol of oxygen produced during the burial of organic matter is balanced  
167 by the oxidation of 4 moles of siderite which produces 4 moles of  $\text{CO}_2$ . One mole of the 4  
168 moles of  $\text{CO}_2$  which is produced goes to the burial of organic carbon while the other 3 to the  
169 weathering of silicates. The overall result is an  $f_{org}$  ratio of 0.25. Thus, this reaction is nearly  
170 isotopically transparent. The increase in the burial of organic carbon in this case is balanced by  
171 an increase in the burial of carbonate carbon at a ratio that is very near the long term average  
172  $\delta^{13}\text{C}$  of the exogenic cycle. Such a reaction would have contributed little to  $^{13}\text{C}$  enrichment  
173 during the Lomagundi Event, and even then mostly via the relatively heavy  $\delta^{13}\text{C}$  value of the  
174 siderite carbon. Contrast Equation S29 with Equations S30 and S31. In the latter two reactions  
175 the burial of organic carbon is not accompanied by the offsetting burial of carbonates making  
176 them much more effective in driving  $^{13}\text{C}$  enrichment.

177 Thus, there are more and less efficient ways to drive  $^{13}\text{C}$  enrichment via siderite oxidation cou-  
178 pled to organic carbon burial. When inverting the  $\delta^{13}\text{C}$  record, one is given a degree of freedom

179 in choosing the varying proportions of the three reactions. By choosing a large proportion of  
180 siderite oxidation coupled to non-Fe-silicate weathering (Equation S29) one could explain the  
181 Lomagundi Event in a way that involves an amount of reactants that exceeds those which were  
182 likely available for oxidation or leads to the production of more products than can be accounted  
183 for.

184 Does such a worst-case-scenario calculation does invalidate the hypothesis? No, it is the best  
185 case scenario which is the test: if it can be shown that even under the most propitious circum-  
186 stances the hypothesis fails, then it can be confidently rejected. Hence, in our tables and model  
187 runs below we focus on the most effective ways to drive the Lomagundi Event and show that  
188 these do not violate mass balance constraints. We do not claim that back reactions (sulfide  
189 burial, oxidation of organic carbon) or the weathering of non-Fe-silicates did not occur, but we  
190 do maintain that these must have been minor in relation to the forward reactions, as demanded  
191 by constraints imposed by the global mass balance on the one hand and the  $\delta^{13}\text{C}$  (and  $\delta^{34}\text{S}$ )  
192 record on the other.

## 193 **S5 Derivation of Equation 10**

194 We can use Equations S30 and S31 to construct a carbon isotopic mass balance. We assume  
195 that some fraction,  $\alpha$ , of the siderite is oxidized together with Fe-silicates according to Equation  
196 S30, and the rest,  $(1 - \alpha)$ , reacts with sulfides and carbonates according to Equation S31. The  
197 first reaction (Equation S30) implies that the burial of organic carbon occurs at a 1:1 ratio with  
198 siderite oxidation, such that a certain portion of organic carbon burial is proportional to the  
199 siderite oxidation flux associated with iron silicate oxidation. Following the same logic, the  
200 stoichiometry of the second reaction is such that for every mol of siderite oxidized, 6/7 mol  
201 of carbonate are acidified and 13/7 mol of organic carbon are buried, inducing the following

202 isotopic mass balance:

$$(1 - \alpha)F_{\text{sid}}^{\text{w}} \delta_{\text{sid}}^{\text{w}} + \frac{6}{7}(1 - \alpha)F_{\text{sid}}^{\text{w}} \delta_{\text{carb}}^{\text{w}} = \frac{13}{7}(1 - \alpha)F_{\text{sid}}^{\text{w}} \delta_{\text{org}}^{\text{b}} \quad (\text{S32})$$

203 Adding the above expressions to the mass balance of the pre-Lomagundi carbon cycle,

$$F_{\text{in}}^{\text{w},0} \delta_{\text{in}}^{\text{w},0} = F_{\text{carb}}^{\text{b},0} \delta_{\text{carb}}^{\text{b}} + F_{\text{org}}^{\text{b},0} \delta_{\text{org}}^{\text{b}} \quad (\text{S33})$$

204 gives:

$$\begin{aligned} & F_{\text{in}}^{\text{w},0} \delta_{\text{in}}^{\text{w},0} + \alpha F_{\text{sid}}^{\text{w}} \delta_{\text{sid}}^{\text{w}} + (1 - \alpha)F_{\text{sid}}^{\text{w}} \delta_{\text{sid}}^{\text{w}} + \frac{6}{7}(1 - \alpha)F_{\text{sid}}^{\text{w}} \delta_{\text{carb}}^{\text{w}} \\ & = F_{\text{carb}}^{\text{b},0} \delta_{\text{carb}}^{\text{b}} + F_{\text{org}}^{\text{b},0} \delta_{\text{org}}^{\text{b}} + \alpha F_{\text{sid}}^{\text{w}} \delta_{\text{org}}^{\text{b}} + \frac{13}{7}(1 - \alpha)F_{\text{sid}}^{\text{w}} \delta_{\text{org}}^{\text{b}} \end{aligned}$$

205 We assume that the isotopic composition of all the organic carbon burial is fractionated by a  
206 constant amount relative to seawater, so given by  $(\delta_{\text{carb}}^{\text{b}} - \epsilon)$ , where  $\epsilon$  is the photosynthetic  
207 fractionation. Collecting terms gives the following mass balance equation:

$$F_{\text{in}}^{\text{w},0} \delta_{\text{in}}^{\text{w},0} + F_{\text{sid}}^{\text{w}} \left[ \delta_{\text{sid}}^{\text{w}} + \frac{6}{7}(1 - \alpha) \delta_{\text{carb}}^{\text{w}} \right] = F_{\text{carb}}^{\text{b},0} \delta_{\text{carb}}^{\text{b}} + \left[ F_{\text{org}}^{\text{b},0} + \left( \frac{13}{7} - \frac{6}{7}\alpha \right) F_{\text{sid}}^{\text{w}} \right] (\delta_{\text{carb}}^{\text{b}} - \epsilon) \quad (\text{S34})$$

208 Rearranging so that it is given for  $\delta^{13}\text{C}$  of the ocean-atmosphere system:

$$\delta_{\text{carb}}^{\text{b}} = \frac{F_{\text{in}}^{\text{w},0} \delta_{\text{in}}^{\text{w},0} + F_{\text{sid}}^{\text{w}} \left[ \delta_{\text{sid}}^{\text{w}} + \frac{6}{7}(1 - \alpha) \delta_{\text{carb}}^{\text{w}} \right] + \epsilon \left[ F_{\text{org}}^{\text{b},0} + \left( \frac{13}{7} - \frac{6}{7}\alpha \right) F_{\text{sid}}^{\text{w}} \right]}{F_{\text{org}}^{\text{b},0} + F_{\text{carb}}^{\text{b},0} + \left( \frac{13}{7} - \frac{6}{7}\alpha \right) F_{\text{sid}}^{\text{w}}} \quad (\text{S35})$$

209 Note that:

$$F_{\text{in}}^{\text{w},0} = F_{\text{org}}^{\text{b},0} + F_{\text{carb}}^{\text{b},0} \quad (\text{S36})$$

210 and

$$F_{\text{in}}^{\text{w},0} \delta_{\text{in}}^{\text{w},0} = F_{\text{org}}^{\text{b},0} (\delta_{\text{carb}}^{\text{b}} - \epsilon) + F_{\text{carb}}^{\text{b},0} \delta_{\text{carb}}^{\text{b}} \quad (\text{S37})$$

211 so that assuming  $\delta_{\text{carb}}^{\text{w},0} = 0$  ‰ gives:

$$F_{\text{in}}^{\text{w}} \delta_{\text{in}} + F_{\text{org}}^{\text{b}} \epsilon = 0 \quad (\text{S38})$$

212 Thus:

$$\delta_{\text{carb}}^{\text{b}} = \frac{F_{\text{in}}^{\text{w},0} \delta_{\text{in}}^{\text{w},0} + \epsilon F_{\text{org}}^{\text{b},0} + F_{\text{sid}}^{\text{w}} \left[ \delta_{\text{sid}}^{\text{w}} + \left( \frac{13}{7} - \frac{6}{7} \alpha \right) \epsilon \right]}{F_{\text{in}}^{\text{w}} + \left( \frac{13}{7} - \frac{6}{7} \alpha \right) F_{\text{sid}}^{\text{w}}} \quad (\text{S39})$$

213 and finally:

$$\delta_{\text{carb}}^{\text{b}} = \frac{F_{\text{sid}}^{\text{w}} \left[ \delta_{\text{sid}}^{\text{w}} + \epsilon \left( \frac{13}{7} - \frac{6}{7} \alpha \right) \right]}{\left( F_{\text{in}}^{\text{w}} + \left( \frac{13}{7} - \frac{6}{7} \alpha \right) F_{\text{sid}}^{\text{w}} \right)} \quad (\text{S40})$$

214 To make the expression more compact we define an alpha prime:

$$\alpha' = \frac{13}{7} - \frac{6}{7} \alpha \quad (\text{S41})$$

215 So the final expression is:

$$\delta_{\text{carb}}^{\text{b}} = \frac{F_{\text{sid}}^{\text{w}} \left[ \delta_{\text{sid}}^{\text{w}} + \epsilon \alpha' \right]}{F_{\text{in}}^{\text{w}} + \alpha' F_{\text{sid}}^{\text{w}}} \quad (\text{S42})$$

216 Equation 10 in the main text (or Equation S42 above) has a Michaelis-Menten form (as is borne  
 217 out in Figure 2: as the value of  $F_{\text{sid}}^{\text{w}}$  increases,  $\delta_{\text{carb}}^{\text{b}}$  asymptotically approaches the value of  
 218  $\frac{\delta_{\text{sid}}^{\text{w}}}{\alpha'} + \epsilon$ , which is approximately 24 ‰. When the siderite flux is zero, the carbon isotopic  
 219 composition of the ocean-atmosphere system returns to its long-term steady-state value of 0‰.

## 220 S6 Global mass balance

221 Using Equation S42 it is further possible to calculate the siderite oxidation flux required by a  
 222 Gaussian shaped positive excursion of up to +10 ‰ of a given duration (Figure S3). The total  
 223 siderite flux is then given by the area under the  $F_{\text{sid}}^{\text{w}}$  curve.

224 To calculate an alpha, we use a constrained optimization algorithm (*fmincon*, Matlab (3)), such  
 225 that a minimum amount of siderite is used, coupled to the constraint that the total integrated  
 226 oxidation of pyrite not exceed the total exogenic sulfur pool of 534 Emol of sulfur. The logic  
 227 behind this choice is that the total amount of exogenic sulfur, which is currently partitioned

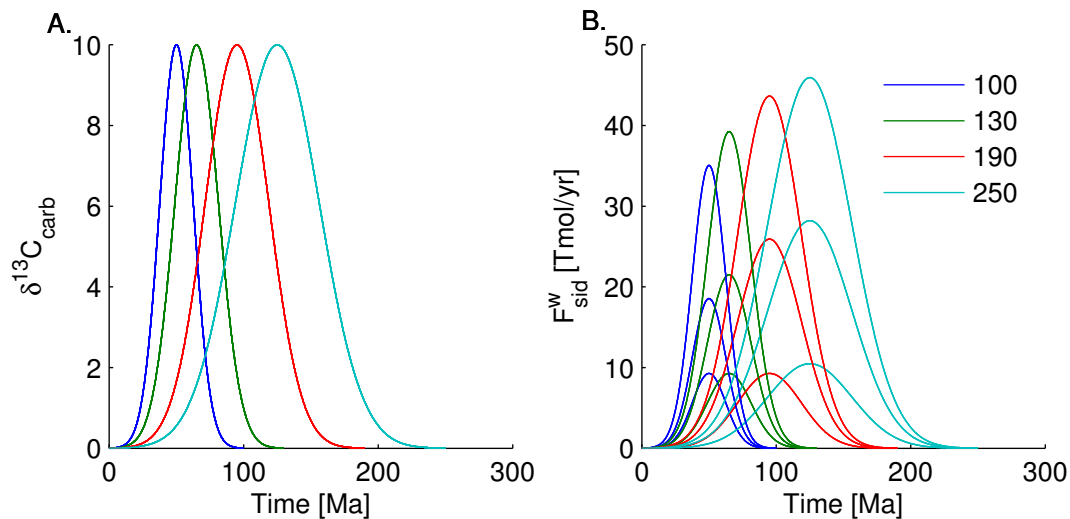

Figure S3: A. Gaussian shaped positive  $\delta_{\text{carb}}^{\text{b}}$  excursions up to +10 ‰ with durations of 100, 130, 190, and 250 m.y. B. The resulting siderite oxidation flux according to Equation S42, with the values of alpha set to keep the total sulfate production below 534 Emol. Area under curves given in Table S3. Different colored curves in both plots correspond to different durations.

228 between the ocean, continental sulfide, and continental sulfate, likely existed entirely as con-  
 229 tinental sulfide prior to the Lomagundi event, and was thus available for oxidation during the  
 230 event. We do not claim that all the sulfur was oxidized and precipitated as gypsum. Rather,  
 231 we utilize this constraint as an upper theoretical bound on the extent of siderite oxidation via  
 232 Equation S31.

233 The results are given in Table S3 for four durations (100, 130, 190, and 250 m.y.) and three  
 234 input fluxes (25, 50, and 75 Tmol/yr). The code to produce the figure and table is given in  
 235 the supplementary files. We also include the cumulative amounts of reactants consumed and  
 236 products produced during our dynamic model runs, which are discussed in Section S7. The  
 237 three runs (Model 1–3) given are the same model runs that are presented in Figure S7. Positive  
 238 values for  $\text{CaCO}_3$  in the first two runs indicate that carbonate dissolution was lower in the  
 239 perturbed state than in steady-state. This is due to the lower than baseline  $p\text{CO}_2$  which occurs

240 in those two runs.

| $F_{in}^w$                                  | Duration | FeS <sub>2</sub> | CaCO <sub>3</sub> | FeSiO <sub>3</sub> | FeCO <sub>3</sub> | Fe <sub>2</sub> O <sub>3</sub> | CaSO <sub>4</sub> | CH <sub>2</sub> O | $\alpha$ |
|---------------------------------------------|----------|------------------|-------------------|--------------------|-------------------|--------------------------------|-------------------|-------------------|----------|
| 25 Tmol/yr                                  | 100 my   | -125             | -249              | 0                  | -291              | 208                            | 249               | 540               | 0        |
| 25 Tmol/yr                                  | 130 my   | -162             | -324              | 0                  | -378              | 270                            | 324               | 702               | 0        |
| 25 Tmol/yr                                  | 190 my   | -237             | -473              | 0                  | -552              | 394                            | 473               | 1025              | 0        |
| 25 Tmol/yr                                  | 250 my   | -267             | -534              | -593               | -821              | 840                            | 534               | 1355              | 0.24     |
| 50 Tmol/yr                                  | 100 my   | -249             | -498              | 0                  | -581              | 415                            | 498               | 1079              | 0        |
| 50 Tmol/yr                                  | 130 my   | -267             | -534              | -760               | -876              | 952                            | 534               | 1410              | 0.29     |
| 50 Tmol/yr                                  | 190 my   | -267             | -534              | -2760              | -1543             | 2285                           | 534               | 2077              | 0.6      |
| 50 Tmol/yr                                  | 250 my   | -267             | -534              | -4759              | -2209             | 3618                           | 534               | 2743              | 0.72     |
| 75 Tmol/yr                                  | 100 my   | -267             | -534              | -1426              | -1098             | 1396                           | 534               | 1632              | 0.43     |
| 75 Tmol/yr                                  | 130 my   | -267             | -534              | -2926              | -1598             | 2396                           | 534               | 2132              | 0.61     |
| 75 Tmol/yr                                  | 190 my   | -267             | -534              | -5926              | -2598             | 4396                           | 534               | 3132              | 0.76     |
| 75 Tmol/yr                                  | 250 my   | -267             | -534              | -8926              | -3598             | 6396                           | 534               | 4132              | 0.83     |
| Model 1                                     | 130 my   | -41              | 644               | -2441              | -813              | 1648                           | 82                | 806               | 0.88     |
| Model 2                                     | 130 my   | -45              | 34                | -3051              | -1118             | 2108                           | 91                | 1205              | 0.90     |
| Model 3                                     | 130 my   | -50              | -574              | -3662              | -1424             | 2568                           | 101               | 1604              | 0.92     |
| Estimated crustal reservoir size (all refs) |          | 84 – 294         | 2800 – 9600       | 2886               | 350 – 3000        | 50 / 4000                      | 81 – 240          | 675 – 1700        |          |
| Garrels and Perry (4)                       |          | 294              | 5083              | –                  | 350               | 263                            | 240               | 1042              |          |
| Sleep (5)                                   |          | 170              | 6000              | –                  | –                 | 50/4000                        | 180               | 1200              |          |
| Holser et al. (6)                           |          | 84 – 294         | 3505 – 6460       | –                  | –                 | –                              | 81 – 240          | 930 – 1300        |          |
| Hayes and Waldbauer (7)                     |          | –                | 2800 – 9600       | –                  | –                 | –                              | –                 | 675 – 1700        |          |
| Yaroshevsky (8)                             |          | 229              | 5790              | 2886               | –                 | 393/1280                       | 318               | 1100              |          |
| Ronov et al. (9)                            |          | –                | –                 | –                  | 3000              | –                              | –                 | –                 |          |

Table S3: Top: total amounts in Emol ( $10^{18}$ ) of reactants consumed and products generated during a Gaussian shaped  $\delta^{13}\text{C}$  excursion of up to + 10 ‰, obtained via two different calculations. First, by utilizing Equation 10 (Figure S3), together with the constraint that the amount of pyrite oxidized together with siderite (Reaction 9) did not generate sulfate in excess of the modern  $\text{CaSO}_4 + \text{FeS}_2$  reservoirs (534 Emol); siderite oxidation accompanied by iron silicate oxidation (Reaction 8) was presumed to make up the remainder. Second, using the dynamic model runs, in which case runs with non-physical atmospheric chemistries ( $p\text{O}_2 \gg 1$  atm and  $p\text{CO}_2 \ll 0$  atm) were rejected. The three runs (Model 1–3) are the same model runs presented in Figure S7. Positive values for  $\text{CaCO}_3$  in the first two runs indicate that carbonate dissolution was lower in those runs than in steady-state. In all cases the fraction of siderite accompanied by  $\text{FeSiO}_3$  oxidation (Reaction 8) is given by  $\alpha$ . Bottom: estimated reservoir sizes. All are given for the present, except for siderite which is given for 2.2 Ga. Higher  $\text{Fe}_2\text{O}_3$  estimate includes oxidized iron in crystalline silicate rocks.

241 To compare the results of our calculations to measured values, we compiled estimates of rele-  
 242 vant sedimentary reservoir sizes. First, we give some comments on the estimates culled from  
 243 the literature which are presented at the bottom of Table S3. We then discuss the degree of  
 244 correspondence between our calculations and the estimates. The most detailed inventory of the



245 sizes of the crustal reservoirs of  $\text{CaCO}_3$ ,  $\text{C}_{\text{org}}$ ,  $\text{FeS}_2$ , and  $\text{CaSO}_4$  can be found in Holser et al.  
246 (6), which also summarizes previous estimates from Holser and Kaplan (10), Li (11), Garrels  
247 and Perry (4), Schidlowski and Eichmann (12), Nielsen (13), and Garrels and Lerman (14). The  
248 reported values fall in the range of 84 – 294 Emol S for the sulfide reservoir; 81 – 240 Emol S  
249 for the sulfate reservoir; 3505 – 6460 Emol for  $\text{CaCO}_3$ ; and 930 – 1300 Emol for  $\text{C}_{\text{org}}$ . Hayes  
250 and Waldbauer (7) give an updated and in-depth discussion, which, in addition to the values  
251 given by Holser et al., summarizes more recent values for sedimentary compilations given by  
252 Wedepohl (15), Hunt (16), Des Marais (17), Berner (18), and Arvidson et al. (19), which fall  
253 within the range of 2800 – 6500 Emol of  $\text{CaCO}_3$  and 675 – 1300 Emol of  $\text{C}_{\text{org}}$ . They also cite  
254 mass-age data on carbonates from Wilkinson and Walker (20), which suggest a somewhat larger  
255 carbonate reservoir size (7900 – 9600 Emol), and thus a correspondingly larger  $\text{C}_{\text{org}}$  reservoir  
256 size (1400 – 1700).

257 Estimates for crustal iron are given by Yaroshevsky (8), who summarizes previous results from  
258 Vinogradov (21) and Ronov et al. (22): the sedimentary shell is estimated to contain 393.75  
259 Emol of oxidized iron and 1018.5 Emol of reduced iron, with another 888 Emol of oxidized  
260 iron and 1867 Emol of reduced iron in the upper crust (granitic-metamorphic shell), totaling  
261 1280 Emol of oxidized iron and 2886 of reduced iron. For oxidized iron, Garrels and Perry  
262 estimate the excess oxidized iron in sedimentary rocks at 263 Emol  $\text{Fe}_2\text{O}_3$ . Sleep (5) gives a  
263 lower estimate for sedimentary oxidized iron: 50 Emol of sedimentary  $\text{Fe}_2\text{O}_3$ , requiring 100  
264 Emol of Fe and 25 Emol of  $\text{O}_2$  to have been produced, but a higher estimate for oxidized crustal  
265 iron (including hard rocks) of 4000 Emol of  $\text{Fe}_2\text{O}_3$ , requiring 8000 Emol Fe and 2000 Emol  
266  $\text{O}_2$ , though he does acknowledge that the uncertainties in composition of the lower continental  
267 crust could lead to the lower, but still very large, estimate of 2000 Emol  $\text{Fe}_2\text{O}_3$ , requiring 1000  
268 Emol of  $\text{O}_2$  to have been produced. Hayes and Waldbauer (7) cite Ronov and Yaroshevsky  
269 (23) for an estimate of 1020  $\text{O}_2$  equivalents, or 2040 Emol of  $\text{Fe}_2\text{O}_3$ , and a higher estimate

270 from Goldschmidt of 1860 Emol O<sub>2</sub> equivalents, or 3720 Emol Fe<sub>2</sub>O<sub>3</sub>—near the estimate of  
271 Sleep. Altogether, the estimates converge on oxidized crustal iron as being the most substantial  
272 reservoir of O<sub>2</sub> equivalents.

273 For siderite, other than the anecdotal descriptions of its relative abundance given in Ohmoto  
274 et al. (24), the only quantitative estimate is by Ronov et al. (9) based on observations of the  
275 Russian platform. At 2.3 Ga, they estimate that Jasperlites (which, as stated in the text, are  
276 considered to be altered siderites) to constitute 14% of the sedimentary shell of 25,000x10<sup>20</sup> gr,  
277 or 3.0x10<sup>21</sup> mol FeCO<sub>3</sub>. Incorporating models for sediment recycling results in an even larger  
278 estimate of 22%, as discussed by Garrels and Mackenzie (25). In fact, the large increase in  
279 Jasperlites followed by their total disappearance in the phanerozoic is perhaps one of the most  
280 remarkable features of Ronov et al's data, as already pointed out by Garrels and Mackenzie (25).  
281 Garrels and Perry (4) give a value of 350 Emol of sedimentary FeCO<sub>3</sub>, though this estimate is  
282 based on the amounts required to balance oxidized sedimentary iron rather than by rock data.  
283 Nonetheless, their logic holds, and the much larger estimates for oxidized iron which include  
284 iron in crystalline silicate rocks correspond very well to the total estimated the mass of siderite  
285 available for oxidation at 2.3 Ga.

286 How did such large amounts of oxidized iron accumulate in the crust? During the Archean iron  
287 was likely delivered in reduced form from the weathering of silicate rocks and the dissolution  
288 of pyrite and siderite in sedimentary rocks. It likely exited the ocean in equally reduced form  
289 as pyrite and siderite. Ferric to total iron ratios in shales are not much different from mantle  
290 values until the Great Oxidation Event (38) and it is only following during it that the ferric iron  
291 content of shales rises substantially. During the Lomagundi Event *p*O<sub>2</sub> rose to significant levels  
292 for the first time and reduced iron delivered from weathering became oxidized on land for the  
293 first time. The weathered iron accumulated as oxidized iron in shales and as redbeds on the con-

294 tinentes (redbeds make their first appearance following the Great Oxidation Event). In addition,  
295 diagenetic alteration of reduced iron as oxidizing fluids flowed through sedimentary basins for  
296 the first time likely also led to substantial accumulation of iron oxides (39). Oxidation of iron  
297 in mid-ocean ridge basalts by oceanic sulfate (which likely rose from very low Archean levels  
298 for the first time) likely also contributed to growth of the oxidized iron reservoir. The iron in  
299 oceanic basalts undergoing subduction would have been particularly likely to be incorporated  
300 into crystalline rocks of the continental crust. During the remainder of the Proterozoic, fol-  
301 lowing the Lomagundi Event, weathering would have delivered both oxidized iron and reduced  
302 iron. The fraction of iron that in reduced form was likely oxidized subaerially. Some of that iron  
303 accumulated as redbeds while some of it was delivered to the marine realm where it was likely  
304 reduced and exited as pyrite. This situation likely persisted until oxidation of the deep ocean,  
305 much later, during the Phanerozoic, which led to an additional loci of iron oxide deposition in  
306 deep sea.

307 Comparing the values computed according to Equation 10, and the estimated sizes of the crustal  
308 reservoirs, in particular of organic carbon, oxidized iron, and sulfate, given in Table S3, shows  
309 that the lower estimates (corresponding to a lower duration of the Lomagundi Event and/or  
310 lower estimates for total carbon input) match reasonably well to the existing crustal reservoirs.  
311 Moreover, the larger estimates for organic carbon, though they exceed the estimates for the  
312 *current* reservoirs, do not invalidate the conclusions, as material could have been lost since the  
313 Lomagundi Event. For instance, subduction of organic carbon or its oxidation subsequently  
314 to the Lomagundi Event could have led to a smaller fraction of the produced organic carbon  
315 being preserved. In particular, the hypothesis that subduction of organic carbon as well as its  
316 oxidation to methane were accelerated during and immediately following the Lomagundi Event  
317 is an attractive one, as it would explain the unidirectional and permanent nature of the Earth  
318 surface oxidation that occurred in association with it.

319 Many workers have highlighted the fact that Earth has an excessively oxidized atmosphere  
320 and crust. In particular, Lovelock (27, 28) pointed out that while Mars and Venus are at the  
321 equilibrium redox potential appropriate to their stations in the solar system, that of Earth is far  
322 more oxidized than its position would suggest. The implication is that Earth's unique features,  
323 plate tectonics and life, are likely responsible for its current redox state (see also Hayes and  
324 Waldbauer, 7). This process was very likely aided by a methane "hydrogen balloon" (Lovelock  
325 and Lodge (27), Catling et al. (29)) which transported hydrogen to the upper atmosphere. We  
326 suggest that the processes of hydrogen loss to space and to the mantle may have been pulsed  
327 as well, and tightly coupled to episodes of organic carbon production (and burial). Thus, the  
328 oxidized products accumulated in the crust and atmosphere, while the reducing power was  
329 transferred to organic carbon, and then subsequently subducted into the mantle and lost to space.  
330 It is worth emphasizing the main difference between our own interpretation of the carbon cycle  
331 and that of Hayes and Waldbauer, and others before them, is that while they postulate that  
332 the accumulation of oxidants ( $\text{Fe}^{3+}$ ,  $\text{SO}_4^{2-}$ ,  $\text{O}_2$ ) and reductants ( $\text{C}_{\text{org}}$ ,  $\text{FeS}_2$ ) occurred gradually  
333 throughout the Geozoic, we acknowledge the possibility that large portions of these reservoirs  
334 could have been accumulated, and destroyed, in shorter periods of geologic time (on the order  
335 of tens to hundreds of millions of years).

## 336 **S7 Model Description**

337 The model includes mass boxes for the oceanic concentrations of carbon, calcium, sulfur, phos-  
338 phate, oxygen, and alkalinity, as well as isotopic mass for carbon, calcium and sulfate (Figure  
339 S4). The sedimentary reservoirs included in the model are organic carbon, carbonate carbon,  
340 sulfide sulfur, sulfate sulfur, reduced iron, and siderite. A carbonate system solver, modified  
341 from Emerson and Hedges (30) and Zeebe and Wolf-Gladrow (31), is used to calculate  $p\text{CO}_2$ ,

342 pH, and the carbonate saturation state ( $\Omega$ ) from values of alkalinity and DIC at every model  
 343 timestep. Complete list of constitutive equations and flux relations is given in Section S8. The  
 344 full code is supplied in supplemental files.

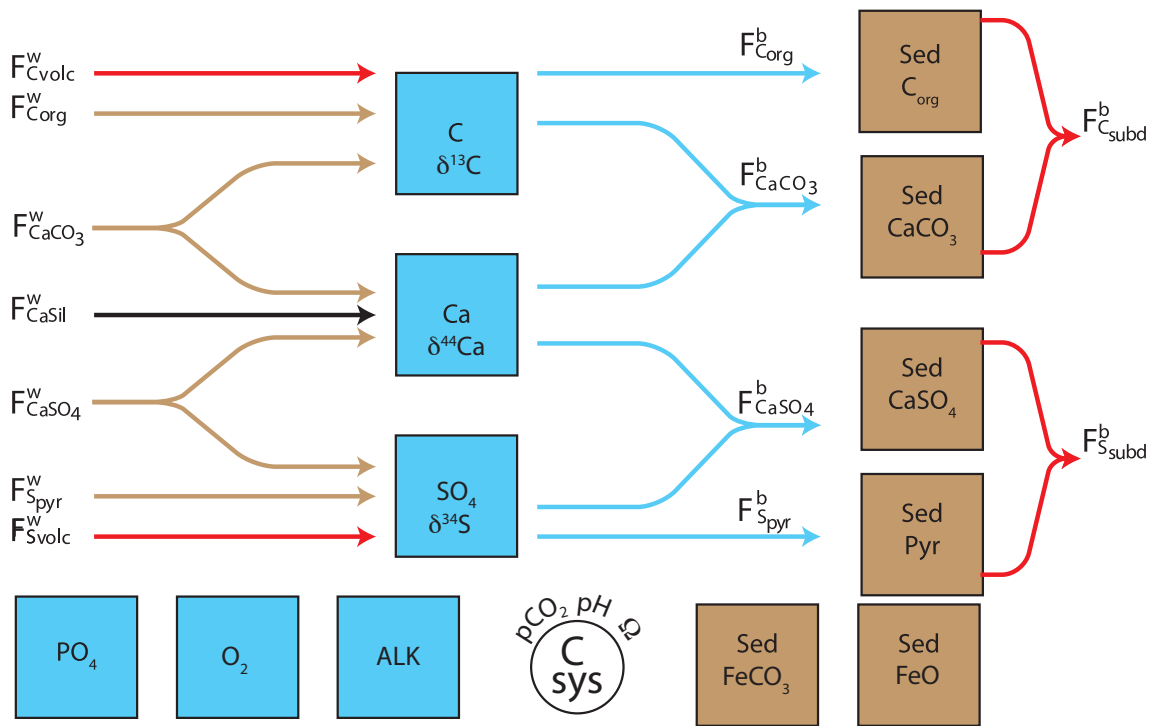

Figure S4: Sketch of model setup. Oceanic and atmospheric reservoirs in blue, sedimentary reservoirs in brown. Burial fluxes from the ocean in blue, weathering fluxes in brown, subduction fluxes and volcanic fluxes in red.  $C_{sys}$  stands for carbonate system solver.

345 The first numerical experiment we perform is a simple sanity test: we force the model with  
 346 weathering fluxes of siderite, sulfide, and carbonate, and burial of organic carbon and sulfate,  
 347 in stoichiometric relations according to Equation 9 in the main text, such that a +10 permil  
 348 excursion results. This perturbation is a “Goldilocks” solution with the reactants and products  
 349 exactly balanced so should incur no changes in  $pO_2$  or  $pCO_2$ . Results are shown in Figure  
 350 S5. In Table S4 we give the values produced by the model, calculated in two ways: firstly,  
 351 by integrating the relevant fluxes with respect to time, and secondly by subtracting the initial

|           | Duration | FeS <sub>2</sub> | CaCO <sub>3</sub> | FeSiO <sub>3</sub> | FeCO <sub>3</sub> | Fe <sub>2</sub> O <sub>3</sub> | CaSO <sub>4</sub> | CH <sub>2</sub> O | $\alpha$ |
|-----------|----------|------------------|-------------------|--------------------|-------------------|--------------------------------|-------------------|-------------------|----------|
| Model Int | 100 my   | -249.44          | -498.89           | 0                  | -582.03           | 415.74                         | 498.89            | 1080.92           | 0        |
| Model Sub | 100 my   | -249.44          | -498.88           | 0                  | -582.03           | 415.74                         | 498.88            | 1080.92           | 0        |
| Calc      | 100 my   | -249.06          | -498.11           | 0                  | -581.13           | 415.09                         | 498.11            | 1079.24           | 0        |

Table S4: Table comparing model output to analytical calculations. First row (Model Int) is obtained by integrating the time-varying fluxes in the model. The second row is obtained by subtracting initial and final sedimentary reservoir sizes. The third row (Calc) are the same values given in Table S3 (5<sup>th</sup> row: 50 Tmol/yr, 100 m.y.) but without rounding. Nearly identical solutions between the first and second rows indicate that the model conserves mass. Nearly identical solutions of the semi-analytical calculation and numerical model indicate that the model is accurate.

352 and final sedimentary reservoir masses. The differences between the first row (integration) and  
353 second row (subtraction) are in the second decimal point, indicating that the model preserves  
354 mass. The differences between the model and the calculation arise due to truncation error, as  
355 well as the maximal  $\delta^{13}\text{C}$  in the model, which is 10.001‰, as opposed to an exact 10‰ in the  
356 calculation. The differences are on the order of 0.15% of the analytical solution, indicating that  
357 the model is reasonably accurate.

358 The next numerical experiment we perform is to incorporate parameterizations for the weath-  
359 ering and burial fluxes, and force a pulse of organic carbon burial. We first force the model  
360 without any pyrite oxidation, and we then add two different parameterizations of the pyrite  
361 oxidation flux. We show the model outputs for  $\delta^{13}\text{C}$ ,  $p\text{CO}_2$ , and  $p\text{O}_2$  in Figure S6.

362 The model results are that under the scenario of pyrite oxidation according to the Williamson  
363 and Rimstidt parameterization (green dashed line)  $p\text{CO}_2$  falls to 46.6 ppm. Under the scenario  
364 where the pyrite and gypsum weathering fluxes are set to the modern ones with modification  
365 for the reservoir size (blue solid line),  $p\text{CO}_2$  falls the least, but still reaches very low values  
366 of 108.3 ppm. The decline in  $p\text{CO}_2$  is driven by the burial of organic carbon: the removal of  
367 DIC from ocean water, with little accompanying alkalinity, drives the carbonate system from  
368 neutrality and towards a zone of higher pH and lower  $p\text{CO}_2$ . The weathering fluxes, which are

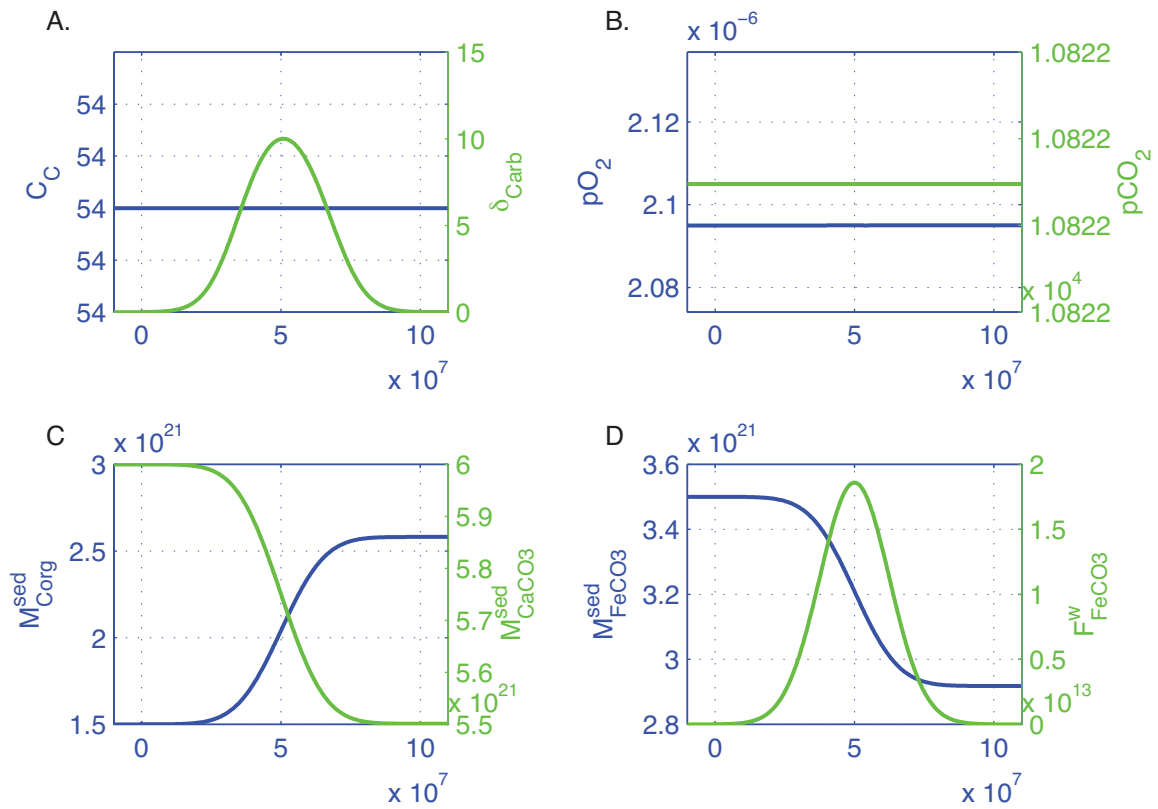

Figure S5: Model outputs for a pulse of carbon burial coupled to carbonate carbon acidification, sulfide oxidation, and siderite oxidation in accordance with Equation 9 in the main text, such that a +10 permil excursion results. This perturbation does not result in changes in  $pO_2$  or  $pCO_2$  since it follows a stoichiometrically balanced reaction for both species. A. The concentration of inorganic carbon in the ocean ( $C_C$ ) and its isotopic composition ( $\delta_{Carb}$ ). B. Atmospheric oxygen and carbon dioxide concentrations ( $pO_2$ ,  $pCO_2$ ). C. Mass of sedimentary organic carbon and carbonate carbon reservoirs ( $M_{Corg}^{sed}$  and  $M_{CaCO3}^{sed}$ ). D. Mass of siderite and the siderite oxidation flux ( $M_{FeCO3}^{sed}$  and  $F_{FeCO3}^W$ ).

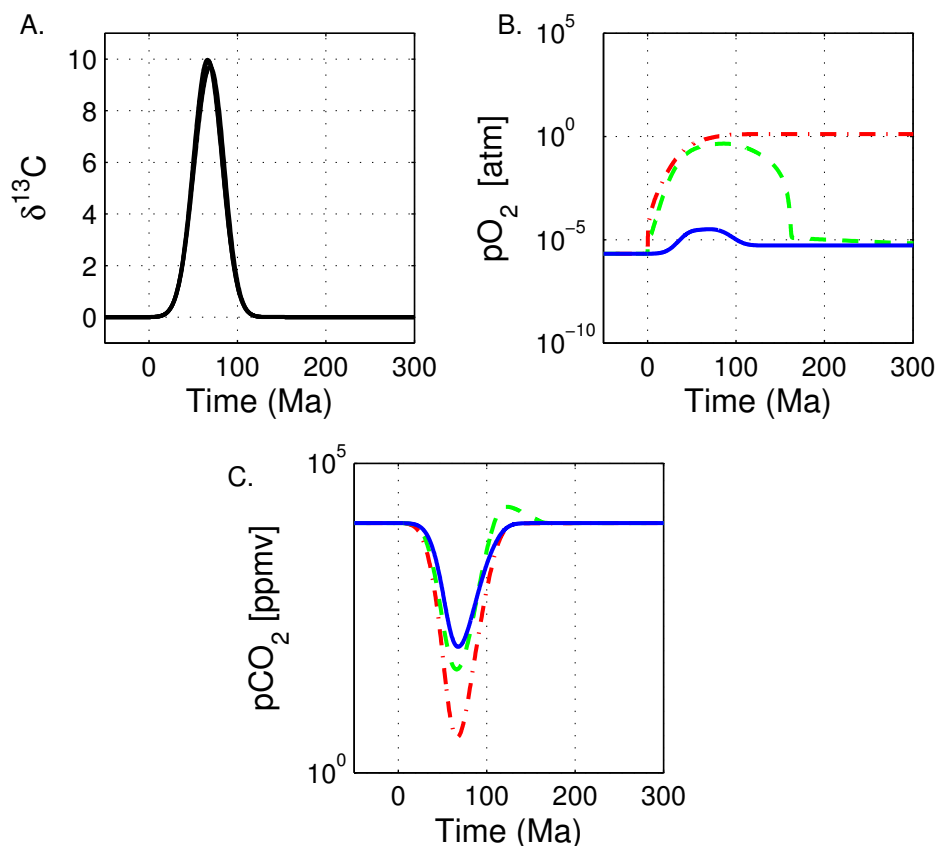

Figure S6: Model outputs for a pulse of carbon burial unaccompanied by increased carbon input. All simulations show a drop in  $p\text{CO}_2$  to extremely low levels. Under the scenario of no pyrite oxidation (red dash-dotted line)  $p\text{CO}_2$  falls to 3.76 ppm, close to the theoretical value calculated in Table S1. Under the scenario of pyrite oxidation according to the Williamson and Rimstidt parameterization (green dashed line)  $p\text{CO}_2$  falls to 46.6 ppm. Under the scenario where the pyrite and gypsum weathering fluxes are set to the modern ones with modification for the reservoir size (blue solid line),  $p\text{CO}_2$  falls the least, but still reaches very low values of 108.3 ppm. The inclusion of pyrite oxidation impacts the  $p\text{O}_2$  response as well. Without pyrite oxidation, oxygen accumulates and remains high, whereas with pyrite oxidation,  $p\text{O}_2$  returns to baseline after the perturbation. The peak values for  $p\text{O}_2$  are 0.46 atm (2.1 PAL) under the Williamson and Rimstidt parameterization, and  $3 \times 10^{-5}$  (3x baseline) under the alternative parameterization. Note log scale on y axes in B. and C.



369 set to be proportional to  $p\text{CO}_2^{0.3}$ , respond by declining, thus lowering the input of carbon and  
 370 alkalinity from weathering. The carbonate burial flux, which is proportional to the carbonate  
 371 saturation state, declines as well, even as pH increases, because of the reduction in the input of  
 372  $\text{Ca}^{2+}$ . The system thus approaches a new equilibrium, one in which the inputs of alkalinity are  
 373 equal to the much reduced outputs of alkalinity. When sulfide oxidation is added to the model  
 374 weathering fluxes, the contribution of sulfate helps mitigate the imbalance in alkalinity, thus  
 375 resulting in higher  $p\text{CO}_2$  levels. The oxidation of pyrite also leads to a more realistic behavior  
 376 of  $\text{O}_2$ , whereby instead of accumulating in the atmosphere and remaining constant after the  
 377 perturbation,  $\text{O}_2$  returns to steady-state after the perturbation (compare dash-dotted curve to the  
 378 dashed and solid lines in Figure S6.B).

379 Since the parameterization of the pyrite oxidation flux exerts such a strong control on the  $p\text{CO}_2$   
 380 and  $p\text{O}_2$  response of the model during the positive excursion, a brief description of the avail-  
 381 able choices is in order. The first, simpler yet probably less appropriate parameterization, is  
 382 one that takes the current modern estimates and scales them to the size of the Late Archean -  
 383 Early Proterozoic sulfate and sulfide sedimentary reservoirs, which were likely much smaller  
 384 and much larger, respectively. Thus, if the Phanerozoic estimates for the sulfide and sulfate  
 385 sedimentary reservoirs are 294 and 240 Emol (a ratio of 0.55), and associated fluxes are 0.93  
 386 and 0.76 Tmol S /yr (using the values from Garrels and Perry, 4), then assuming a 0.99 ratio  
 387 of sedimentary reservoir masses in favor of sulfide gives fluxes of 1.72 and 0.01 Tmol S /yr for  
 388 the Late Archean - Early Proterozoic. We allow the sulfide oxidation flux to scale as the square  
 389 root of the ratio of  $p\text{O}_2$  to its initial value, and linearly with the size of the remaining pyrite  
 390 reservoir:

$$F_{\text{FeS}_2}^w = F_{\text{FeS}_2}^{w,i} * \left[ \frac{p\text{O}_2}{p\text{O}_{2,i}} \right]^{0.5} * \left[ \frac{M_{\text{FeS}_2}^{\text{sed}}}{M_{\text{FeS}_2,i}^{\text{sed}}} \right] \quad (\text{S43})$$

391 The alternative formulation takes into account the kinetics of pyrite oxidation as experimentally

392 constrained by Williamson and Rimstidt (32) (see also Bolton et al., 33):

$$R_{FeS_2} = \frac{10^{-8.19} [pO_2 * K_H^{O_2}]^{0.5}}{[H^+]^{0.11}} * 31536000; \quad (S44)$$

393 where  $R_{FeS_2}$  is the rate at which pyrite is oxidized with units of  $[\frac{mol}{m^2 yr}]$  (the factor of 31536000  
 394 converts from seconds to years). It is observed to scale with the square root of the dissolved  
 395 aqueous  $O_2$  concentration (which is given by atmospheric  $O_2$  multiplied by Henry's constant for  
 396 oxygen, 0.00126 [mol/L/Atm at 25C]), and to be weakly inversely proportional (0.11 power) to  
 397 the concentration of protons in the weathering solution, which we calculate as pH of pristine  
 398 rainwater in equilibrium with atmospheric  $CO_2$ , which is given as the roots of a cubic equation  
 399 in  $[H^+]$  (Harte (34), Stumm and Morgan (35)):

$$[H^+]^3 - [pCO_2 * k_1 * k_H + k_w] * [H^+] - 2 * (pCO_2 * k_2 * k_1 * k_H) \quad (S45)$$

400 with the appropriate rate constants:  $k_H = 10^{-1.47}$ ,  $k_1 = 10^{-6.35}$ ,  $k_2 = 10^{-10.33}$ ,  $k_w = 10^{-14}$ .  
 401 Once the oxidation rate is known, a scaling relationship between the calculated rate of pyrite  
 402 oxidation under modern  $pCO_2$  and  $pO_2$  conditions ( $R_{FeS_2}^{mod}$ ), and the estimated modern pyrite  
 403 oxidation flux ( $F_{FeS_2}^{w,mod}$ ) and reservoir size ( $M_{FeS_2}^{sed,mod}$ ) can be obtained:

$$K_{Pyr}^{ox} = \frac{F_{FeS_2}^{w,mod}}{R_{FeS_2}^{mod} * M_{FeS_2}^{sed,mod}} \quad (S46)$$

404 This constant ( $K_{Pyr}^{ox}$ ) can then be used to calculate the pyrite oxidation flux under different  
 405 boundary conditions of reservoir size and oxidation rate (as a function of  $pO_2$  and  $pCO_2$ ):

$$F_{FeS_2}^w = K_{Pyr}^{ox} * R_{FeS_2} * M_{FeS_2}^{sed}; \quad (S47)$$

406 The result of scaling to a higher  $pCO_2$ , lower  $pO_2$ , and larger reservoir size, is that pyrite  
 407 oxidation is calculated to be substantially smaller in the low- $O_2$  Archean (approximately  $1 \times 10^9$   
 408 Tmol/yr versus  $1 \times 10^{11}$  Tmol/yr in the present). The initial magnitude of the sulfide oxidation  
 409 flux under the different parameterizations ( $4.47 \times 10^9$  or  $1.67 \times 10^{12}$  Tmol/yr) makes a difference

410 for how high  $pO_2$  needs to go up to increase the flux such that it balances the accumulation of  
411 alkalinity due to organic carbon burial. The higher the initial value, the less  $pO_2$  has to increase  
412 in order to balance the input and outputs of carbon and alkalinity. Nonetheless, because of the  
413 inherent imbalances associated with pyrite oxidation, which lead to a shortage of carbon,  $pCO_2$   
414 falls to low levels, irrespective of the parameterization used.

415 Next, we perturb the model with a Gaussian shaped excess organic carbon burial flux, and allow  
416 for siderite and iron silicate oxidation, in addition to pyrite oxidation. The results are shown  
417 in Figure S7. With increasing siderite contribution the  $pO_2$  peak increases, the  $pCO_2$  minimum  
418 rises, and the  $pCO_2$  maximum becomes more pronounced. In the first case (red dash-dotted  
419 line) with 813 Emol of  $FeCO_3$  consumed  $pCO_2$  falls to 2800 ppm and then rises 13,600 ppm.  
420 In the second case (green dashed line) with 1118 Emol of  $FeCO_3$  consumed  $pCO_2$  falls to 7600  
421 ppm and then rises 16,500 ppm. In the third case (blue solid line) with 1424 Emol of  $FeCO_3$   
422 consumed  $pCO_2$  is not reduced at all and then rises 21,150 ppm. Perhaps counter-intuitively,  
423 the increasing amount of siderite causes the  $pCO_2$  peak associated with the declining limb of  
424 the  $\delta^{13}C$  excursion to be smaller. This is because the oxidation of siderite (and iron silicates)  
425 diverts  $O_2$  from sulfide oxidation, and it is the sulfide oxidation flux which drives the increase  
426 in  $pCO_2$  through its effects on alkalinity and thus carbonate burial. A higher sulfide oxidation  
427 flux leads to a smaller carbonate burial flux because of the sulfide oxidation's contribution of  
428 acidity, and hence a larger imbalance which then is required to correct itself, leading to a  $pCO_2$   
429 overshoot.

430 We show the changes in  $[SO_4]$  and  $\delta^{34}S$  of the oceanic sulfate box associated with each of  
431 these three model runs in Figure S8 and Figure S9. The resulting trends in  $\delta^{34}S$ , as stated  
432 in the main text, arise mainly due to two effects. The sharp rise and decline in  $\delta^{34}S$  are a  
433 result of increased fractionation associated with increased availability of sulfate. We use the

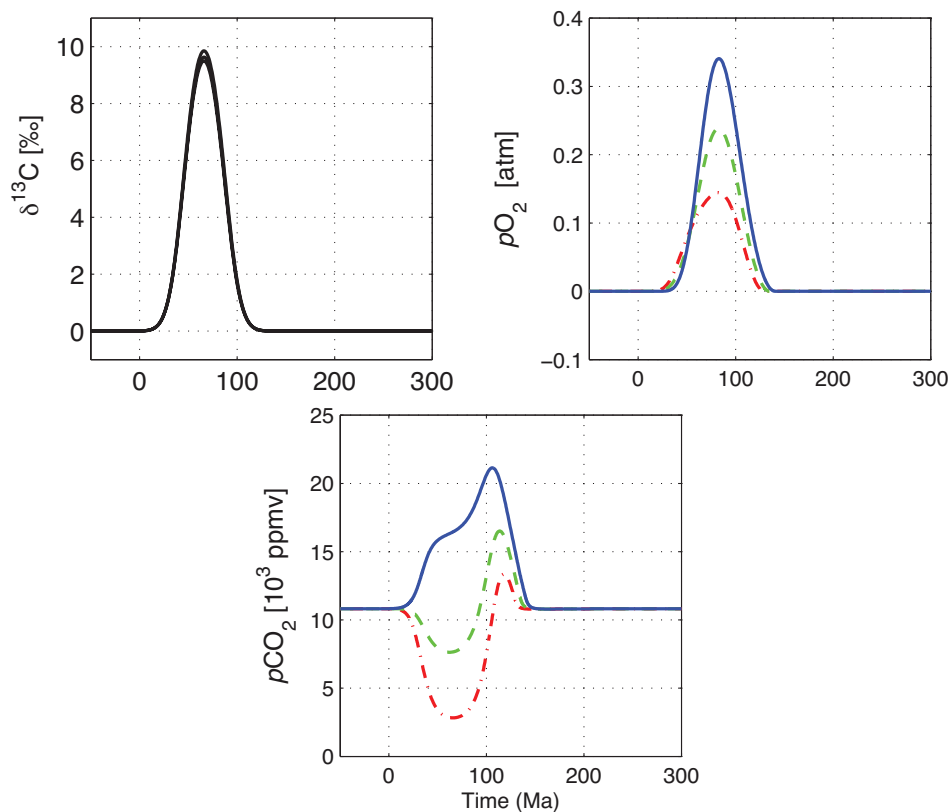

Figure S7: Model outputs for a pulse of carbon burial accompanied by siderite, pyrite, and iron silicate oxidation. With increasing siderite contribution the  $pO_2$  peak increases, the  $pCO_2$  minimum rises, and the  $pCO_2$  maximum becomes more pronounced. In the first case with a low amount of siderite oxidized (red dash-dotted line)  $pCO_2$  falls to 2800 ppm and then rises 13600 ppm, and  $pO_2$  rises to 0.14 Atm. In the second case with an intermediate amount of siderite oxidized (green dashed line)  $pCO_2$  falls to 7600 ppm and then rises 16500 ppm, and  $O_2$  rises to 0.23 Atm. In the third case with a large amount of siderite oxidized (blue solid line)  $pCO_2$  is not reduced at all and then rises 21150 ppm, while  $pO_2$  rises to 0.34 Atm.

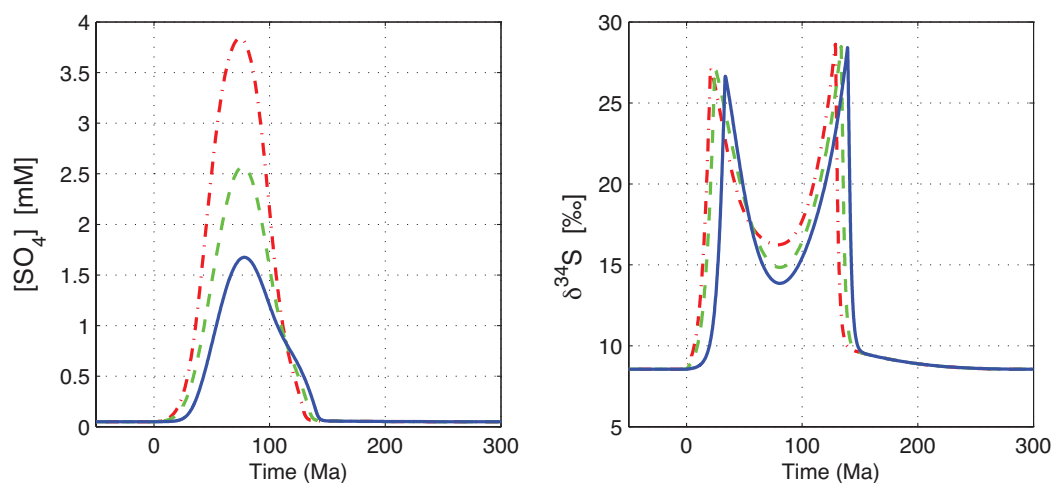

Figure S8: Variation in the  $[\text{SO}_4]$  and  $\delta^{34}\text{S}$  of the oceanic sulfate box, same model runs as in Figure S7 above.

434 parameterization suggested by Habicht et al. (36), with a fractionation factor of 1.029 above  
 435 a threshold of  $190 \mu\text{M}$  and a linear decrease to 1.000 as sulfate decreases towards zero. Since  
 436 all model runs include a rise in  $\text{SO}_4$  above  $190 \mu\text{M}$  there is little variation in the response with  
 437 varying pyrite oxidation rates. In contrast, the drop in  $\delta^{34}\text{S}$  in the middle is a result of the influx  
 438 of light sulfide to the sulfate box from pyrite oxidation, and some variation is apparent: lower  
 439  $\delta^{34}\text{S}$  result from increased sulfate input. As shown in Figure S9 and in the main text these  
 440 results fit the data from Planavsky et al. (37) quite well, lending support to our interpretation of  
 441 the events which occurred during Lomagundi times.

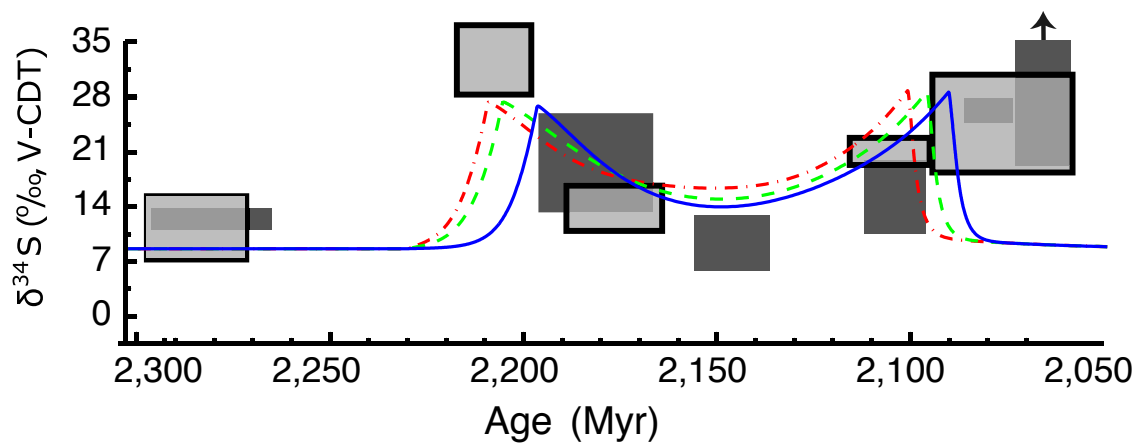

Figure S9: Plot of modeled  $\delta^{34}\text{S}$  variation overlaying data from Planavsky et al. (37). In the model the sharp rise and fall in  $\delta^{34}\text{S}$  are a result of increased fractionation associated with increased availability of sulfate, while the drop in  $\delta^{34}\text{S}$  in the middle is a result of the influx of light sulfide to the sulfate box from pyrite oxidation. Lines are the same model runs as in Figures S7 and S8.

442 **S8 Model Equations**

Table S5: Steady-state values for model fluxes and reservoirs

| Description                                        | Name                     | Value                | Unit   |
|----------------------------------------------------|--------------------------|----------------------|--------|
| Dissolved inorganic carbon                         | DIC                      | $54.0 \cdot 10^{-3}$ | mol/kg |
| Dissolved calcium                                  | Ca                       | $0.13 \cdot 10^{-3}$ | mol/kg |
| Alkalinity                                         | ALK                      | $58.5 \cdot 10^{-3}$ | eq/kg  |
| Dissolved phosphate                                | PO <sub>4</sub>          | $0.25 \cdot 10^{-6}$ | mol/kg |
| Partial pressure of CO <sub>2</sub>                | $p\text{CO}_2$           | 10822                | ppmv   |
| Calcite Saturation                                 | $\Omega$                 | 1.45                 | -      |
| pH                                                 | ph                       | 8.03                 | -      |
| Steady-state volcanic input                        | $F_{\text{volc}}$        | $5 \cdot 10^{12}$    | mol/yr |
| Weathering input of organic carbon                 | $F_{\text{org}}^w$       | $9 \cdot 10^{12}$    | mol/yr |
| Weathering input of CaCO <sub>3</sub>              | $F_{\text{carb}}^w$      | $36 \cdot 10^{12}$   | mol/yr |
| Silicate weathering input of calcium               | $F_{\text{sil}}^w$       | $4 \cdot 10^{12}$    | mol/yr |
| Weathering input of phosphate                      | $F_{\text{p}}^w$         | $9.3 \cdot 10^{10}$  | mol/yr |
| Burial of organic carbon                           | $F_{\text{org}}^b$       | $10 \cdot 10^{12}$   | mol/yr |
| Burial of CaCO <sub>3</sub>                        | $F_{\text{carb}}^b$      | $40 \cdot 10^{12}$   | mol/yr |
| Burial of phosphate                                | $F_{\text{p}}^b$         | $9.3 \cdot 10^{10}$  | mol/yr |
| C:P burial ratio                                   | CP                       | 106                  | -      |
| $\delta^{13}\text{C}$ of volcanic flux             | $\delta_{\text{volc}}$   | -5                   | permil |
| $\delta^{13}\text{C}$ of carbonate weathering      | $\delta_{\text{carb}}^w$ | 0                    | permil |
| $\delta^{13}\text{C}$ of organic carbon weathering | $\delta_{\text{org}}^w$  | -25                  | permil |
| $\delta^{13}\text{C}$ of carbonate burial          | $\delta$                 | 0                    | permil |
| $\delta^{13}\text{C}$ of organic carbon weathering | $\delta_{\text{org}}^b$  | -25                  | permil |
| Photosynthetic fractionation                       | $\epsilon$               | 25                   | permil |

Flux values after DePaolo (40) and Kump and Arthur (1). Magnitude of photosynthetic fractionation from Hayes et al. (41). Concentrations of carbon, calcium, and phosphate converted to masses using an ocean volume of  $1.32 \cdot 10^{21}$  L and salinity of 1.035 kg/L.



Table S6: Isotopic mass equations for oceanic reservoirs

$$\frac{dM_C}{dt} = F_{C_{\text{volc}}}^w + F_{CaCO_3}^w + F_{C_{\text{org}}}^w - F_{C_{\text{org}}}^b - F_{C_{\text{carb}}}^b \quad (\text{S48})$$

$$\frac{dM_{Ca}}{dt} = F_{Ca_{\text{sil}}}^w + F_{CaCO_3}^w + F_{CaSO_4}^w - F_{CaCO_3}^b - F_{CaSO_4}^b \quad (\text{S49})$$

$$\frac{dM_{PO_4}}{dt} = F_{PO_4}^w - F_{PO_4}^b \quad (\text{S50})$$

$$\frac{dM_S}{dt} = F_{S_{\text{volc}}}^w + F_{CaSO_4}^w + F_{Pyr}^w - F_{CaSO_4}^b - F_{Pyr}^b \quad (\text{S51})$$

$$\frac{dO_2}{dt} = F_{C_{\text{org}}}^b + 1.875 F_{Pyr}^b - F_{C_{\text{org}}}^w - 1.875 F_{Pyr}^w - f_{\text{volcC}}^{\text{redox}} F_{C_{\text{volc}}}^w \quad (\text{S52})$$

$$- 1.875 f_{\text{volcS}}^{\text{redox}} F_{S_{\text{volc}}}^w \quad (\text{S53})$$

$$\begin{aligned} \frac{d\delta_C}{dt} = & [F_{C_{\text{volc}}}^w (\delta_{C_{\text{volc}}}^w - \delta_C) + F_{CaCO_3}^w (\delta_{CaCO_3}^w - \delta_C) \\ & + F_{\text{org}}^w (\delta_{\text{org}}^w - \delta_C) - (F_{\text{org}}^b)(-\epsilon_C)] \frac{1}{M_C} \end{aligned} \quad (\text{S54})$$

$$\begin{aligned} \frac{d\delta_{Ca}}{dt} = & [F_{Ca_{\text{sil}}}^w (\delta_{Ca_{\text{sil}}}^w - \delta_{Ca}) + F_{CaCO_3}^w (\delta_{Ca_{\text{carb}}}^w - \delta_{Ca}) \\ & + F_{CaSO_4}^w (\delta_{Ca_{\text{sulf}}}^w - \delta_{Ca}) - (F_{CaCO_3}^b + F_{CaSO_4}^b)(-\epsilon_{Ca})] \frac{1}{M_{Ca}} \end{aligned} \quad (\text{S55})$$

$$\begin{aligned} \frac{d\delta_S}{dt} = & [F_{S_{\text{volc}}}^w (\delta_{S_{\text{volc}}}^w - \delta_S) + F_{CaSO_4}^w (\delta_{\text{Sulf}}^w - \delta_S) + F_{Pyr}^w (\delta_{Pyr}^w - \delta_S) \\ & - F_{Pyr}^b(-\epsilon_S)] \frac{1}{M_S} \end{aligned} \quad (\text{S56})$$

Table S7: Mass and isotopic mass equations for sedimentary reservoirs

$$\frac{dM_{S_{\text{pyr}}}^{\text{sed}}}{dt} = F_{\text{Pyr}}^{\text{b}} - F_{\text{Pyr}}^{\text{w}} - F_{S_{\text{pyr}}}^{\text{subd}} \quad (\text{S57})$$

$$\frac{dM_{S_{\text{sulf}}}^{\text{sed}}}{dt} = F_{\text{CaCO}_3}^{\text{b}} + F_{\text{CaSO}_4}^{\text{b}} - F_{\text{CaSO}_4}^{\text{w}} - F_{S_{\text{sulf}}}^{\text{subd}} \quad (\text{S58})$$

$$\frac{dM_{C_{\text{org}}}^{\text{sed}}}{dt} = F_{C_{\text{org}}}^{\text{b}} - F_{C_{\text{org}}}^{\text{w}} - F_{C_{\text{org}}}^{\text{subd}} \quad (\text{S59})$$

$$\frac{dM_{\text{CaCO}_3}^{\text{sed}}}{dt} = F_{\text{CaCO}_3}^{\text{b}} - F_{\text{CaCO}_3}^{\text{w}} - F_{\text{CaCO}_3}^{\text{subd}} \quad (\text{S60})$$

Table S8: Weathering feedbacks

$$F_{\text{Ca}_{\text{sil}}}^{\text{w}} = F_{\text{Ca}_{\text{sil}}}^{\text{w}} \cdot (R_{\text{CO}_2})^{0.3} \quad (\text{S61})$$

$$F_{\text{CaCO}_3}^{\text{w}} = F_{\text{CaCO}_3, \text{i}}^{\text{w}} \cdot (R_{\text{CO}_2})^{0.3} \quad (\text{S62})$$

$$F_{C_{\text{org}}}^{\text{w}} = F_{C_{\text{org}, \text{i}}}^{\text{w}} \cdot (R_{\text{CO}_2})^{0.3} \quad (\text{S63})$$

$$F_{\text{PO}_4}^{\text{w}} = F_{\text{PO}_4, \text{i}}^{\text{w}} \cdot (R_{\text{CO}_2})^{0.3} \quad (\text{S64})$$

Table S9: Sulfide oxidation feedbacks

$$[H^+] = \text{roots}([H^+]^3 - [pCO_2 * k_1 * k_H + k_w] * [H^+] - 2 * (pCO_2 * k_2 * k_1 * k_H)) \quad (\text{S65})$$

$$k_H = 10^{-1.47}, k_1 = 10^{-6.35}, k_2 = 10^{-10.33}, k_w = 10^{-14} \quad (\text{S66})$$

$$R_{FeS_2} = \frac{10^{-8.19} (pO_2 * K_H^{O_2})^{0.5}}{[H^+]^{0.11}} * 31536000; \quad (\text{S67})$$

$$K_{Pyr}^{ox} = \frac{F_{FeS_2}^{w,mod}}{R_{FeS_2}^{mod} * M_{FeS_2}^{sed,mod}} \quad (\text{S68})$$

$$F_{FeS_2}^w = K_{Pyr}^{ox} * R_{FeS_2} * M_{FeS_2}^{sed}; \quad (\text{S69})$$

Table S10: Burial feedbacks

$$F_{CaCO_3}^b = F_{CaCO_3,i}^b \cdot \left( \frac{\Omega_{CaCO_3}}{\Omega_{CaCO_3,i}} \right) \quad (\text{S70})$$

$$F_{CaSO_4}^b = F_{CaSO_4,i}^b \cdot \left( \frac{ICP_{CaSO_4}}{ICP_{CaSO_4,i}} \right) \quad (\text{S71})$$

$$F_{PO_4}^b = F_{PO_4,i}^b \cdot \left( \frac{M_{PO_4}}{M_{PO_4,i}} \right) \quad (\text{S72})$$

Table S11: Auxiliary definitions

$$\Omega_{\text{CaCO}_3} = \frac{[\text{Ca}] \cdot [\text{CO}_3^-]}{k_{\text{calcite}}^{\text{sat}}} \quad (\text{S73})$$

$$\text{ICP}_{\text{CaSO}_4} = [\text{Ca}] \cdot [\text{SO}_4] \quad (\text{S74})$$

$$[\text{ALK}] = 2[\text{Ca}] - 2[\text{SO}_4] + 2[\text{Mg}] + [\text{K}] + [\text{Na}] - [\text{Cl}] \quad (\text{S75})$$

$$R_{\text{CO}_2} = \frac{p\text{CO}_2}{p\text{CO}_{2,i}} \quad (\text{S76})$$

$$(\text{S77})$$

## References

- [1] Kump, L. R & Arthur, M. A. (1999) Interpreting carbon-isotope excursions: carbonates and organic matter. *Chemical Geology* **161**, 181 – 198.
- [2] Torres, M. A, West, A. J, & Li, G. (2014) Sulphide oxidation and carbonate dissolution as a source of CO<sub>2</sub> over geological timescales. *Nature* **507**, 346–349.
- [3] MATLAB, version R2009a. The MathWorks Inc., Natick, Massachusetts.
- [4] Garrels, R & Perry, E. (1974) *Cycling of carbon, sulphur and oxygen through geologic time*, The sea: ideas and observations on progress in the study of the seas. (J. Wiley, New York) Vol. 5, pp. 303–336.
- [5] Sleep, N. H. (2004) Dioxygen over geological time. *Metal ions in biological systems* **43**, 49–73.
- [6] Holser, W, Schidlowski, M, Mackenzie, F, & Maynard, J. (1988) Geochemical cycles of carbon and sulfur. *Chemical Cycles in the Evolution of the Earth* pp. 105–173.
- [7] Hayes, J. M & Waldbauer, J. R. (2006) The carbon cycle and associated redox processes through time. *Philosophical Transactions of the Royal Society B: Biological Sciences* **361**, 931–950.
- [8] Yaroshevsky, A. (2006) Abundances of chemical elements in the Earth’s crust. *Geochemistry International* **44**, 48–55.
- [9] Ronov, A, Migdisov, A, & Yaroshevsky, A. (1970) *The main stages of geochemical history of the outer shells of the Earth*. (Clarke Cy Washington, DC), pp. 40–53.

- 463 [10] Holser, W & Kaplan, I. (1966) Isotope geochemistry of sedimentary sulfates. *Chemical*  
464 *Geology* **1**, 93–135.
- 465 [11] Li, Y.-H. (1972) Geochemical mass balance among lithosphere, hydrosphere, and atmo-  
466 sphere. *Am. J. Sci* **272**, 119–137.
- 467 [12] Schidlowski, M & Eichmann, R. (1977) *Evolution of the terrestrial oxygen budget*, ed.  
468 Ponnampereuma, C. (Academic Press, New York), pp. 87–89.
- 469 [13] Nielsen, H. (1979) in *Lectures in isotope geology*. (Springer), pp. 283–312.
- 470 [14] Garrels, R. M & Lerman, A. (1981) Phanerozoic cycles of sedimentary carbon and sulfur.  
471 *Proceedings of the National Academy of Sciences* **78**, 4652–4656.
- 472 [15] Wedepohl, K. H. (1995) The composition of the continental crust. *Geochimica et Cos-*  
473 *mochimica Acta* **59**, 1217 – 1232.
- 474 [16] Hunt, J. (1995) *Petroleum Geochemistry and Geology*. (W. H. Freeman., New York), 2nd  
475 edition.
- 476 [17] Des Marais, D. J. (2001) Isotopic evolution of the biogeochemical carbon cycle during  
477 the Precambrian. *Reviews in Mineralogy and Geochemistry* **43**, 555–578.
- 478 [18] Berner, R. (2004) *The Phanerozoic carbon cycle: CO<sub>2</sub> and O<sub>2</sub>*. (Oxford University Press).
- 479 [19] Arvidson, R. S, Mackenzie, F. T, & Guidry, M. (2006) MAGic: A Phanerozoic model for  
480 the geochemical cycling of major rock-forming components. *American Journal of Science*  
481 **306**, 135–190.
- 482 [20] Wilkinson, B. H & Walker, J. C. (1989) Phanerozoic cycling of sedimentary carbonate.  
483 *American Journal of Science* **289**, 525–548.

- 484 [21] Vinogradov, A. (1962) Average contents of chemical elements in the principal types of  
485 igneous rocks in the Earth's crust [in russian]. *Geokhimiya*.
- 486 [22] Ronov, A, Yaroshevskii, A, & Migdisov, A. (1990) *Chemical structure of the Earth's crust*  
487 *and geochemical balance of major elements [in Russian]*.
- 488 [23] Ronov, A & Yaroshevsky, A. (1976) A new model for the chemical structure of the Earth's  
489 crust. *Geochem. Int* **13**, 89–121.
- 490 [24] Ohmoto, H, Watanabe, Y, & Kumazawa, K. (2004) Evidence from massive siderite beds  
491 for a CO<sub>2</sub>-rich atmosphere before ~ 1.8 billion years ago. *Nature* **429**, 395–399.
- 492 [25] Garrels, R. M & Mackenzie, F. T. (1971) *Evolution of sedimentary rocks*. (W.W. Norton  
493 & Company, Inc.).
- 494 [26] Veizer, J. (1978) Secular variations in the composition of sedimentary carbonate rocks, II.  
495 Fe, Mn, Ca, Mg, Si and minor constituents. *Precambrian Research* **6**, 381–413.
- 496 [27] Lovelock, J. E & Lodge Jr, J. P. (1972) Oxygen in the contemporary atmosphere. *Atmo-*  
497 *spheric Environment (1967)* **6**, 575–578.
- 498 [28] Lovelock, J. E & Margulis, L. (1974) Atmospheric homeostasis by and for the biosphere:  
499 the Gaia hypothesis. *Tellus* **26**, 2–10.
- 500 [29] Catling, D. C, Zahnle, K. J, & McKay, C. P. (2001) Biogenic methane, hydrogen escape,  
501 and the irreversible oxidation of early Earth. *Science* **293**, 839–843.
- 502 [30] Emerson, S & Hedges, J. I. (2008) *Chemical oceanography and the carbon cycle*. (Cam-  
503 bridge University Press).

- 504 [31] Zeebe, R. E & Wolf-Gladrow, D. (2001) *CO<sub>2</sub> in Seawater - Equilibrium, Kinetics, Iso-*  
505 *topes*, Elsevier Oceanography Book Series ed. Halpern, D. (Elsevier, Amsterdam) Vol. 65,  
506 p. 346.
- 507 [32] Williamson, M. A & Rimstidt, J. D. (1994) The kinetics and electrochemical rate-  
508 determining step of aqueous pyrite oxidation. *Geochimica et Cosmochimica Acta* **58**,  
509 5443–5454.
- 510 [33] Bolton, E. W, Berner, R. A, & Petsch, S. T. (2006) The weathering of sedimentary organic  
511 matter as a control on atmospheric O<sub>2</sub>: II. Theoretical modeling. *American Journal of*  
512 *Science* **306**, 575–615.
- 513 [34] Harte, J. (1988) *Consider a spherical cow: A course in environmental problem solving.*  
514 (University Science Books).
- 515 [35] Stumm, W & Morgan, J. J. (2012) *Aquatic chemistry: chemical equilibria and rates in*  
516 *natural waters*. (John Wiley & Sons) Vol. 126.
- 517 [36] Habicht, K. S, Gade, M, Thamdrup, B, Berg, P, & Canfield, D. E. (2002) Calibration of  
518 sulfate levels in the Archean ocean. *Science* **298**, 2372–2374.
- 519 [37] Planavsky, N. J, Bekker, A, Hofmann, A, Owens, J. D, & Lyons, T. W. (2012) Sulfur  
520 record of rising and falling marine oxygen and sulfate levels during the Lomagundi event.  
521 *Proceedings of the National Academy of Sciences* **109**, 18300–18305.
- 522 [38] Bekker, A. & Holland, H. (2012) Oxygen overshoot and recovery during the early Paleo-  
523 proterozoic. *Earth and Planetary Science Letters* **317**, 295–304.
- 524 [39] Rasmussen, B., Krapež, B., & Meier, D. B. (2014) Replacement origin for hematite in



- 525 2.5 Ga banded iron formation: Evidence for postdepositional oxidation of iron-bearing  
526 minerals. *Geological Society of America Bulletin*, **126**,438–446.
- 527 [40] DePaolo, D. J. (2004) Calcium isotopic variations produced by biological, kinetic, ra-  
528 diogenic and nucleosynthetic processes. *Reviews in Mineralogy and Geochemistry* **55**,  
529 255–288.
- 530 [41] Hayes, J. M, Strauss, H, & Kaufman, A. J. (1999) The abundance of  $^{13}\text{C}$  in marine organic  
531 matter and isotopic fractionation in the global biogeochemical cycle of carbon during the  
532 past 800 Ma. *Chemical Geology* **161**, 103 – 125.
